# Supplementary material for: Association mapping in sunflower for sclerotinia head rot resistance
Source: PubMed Central journal article supplement (PMC3778846; doi:10.1186/1471-2229-12-93), 2012-06-18

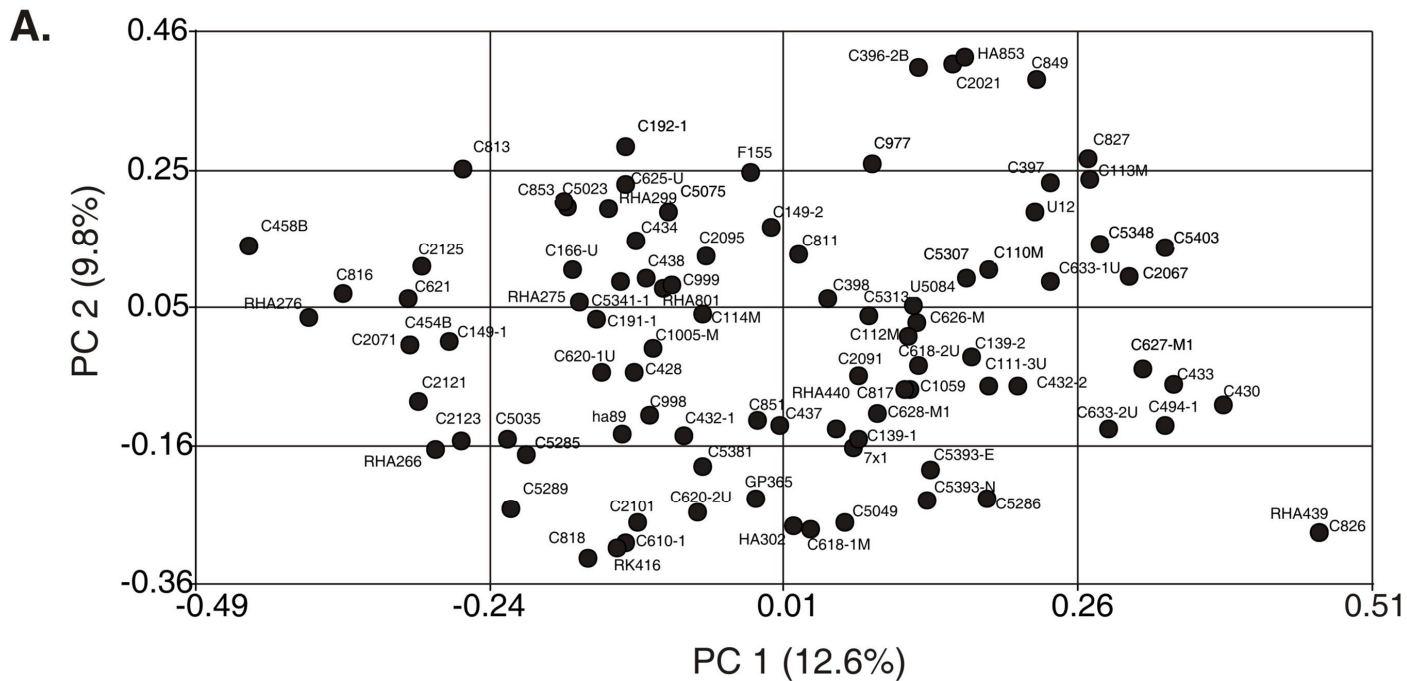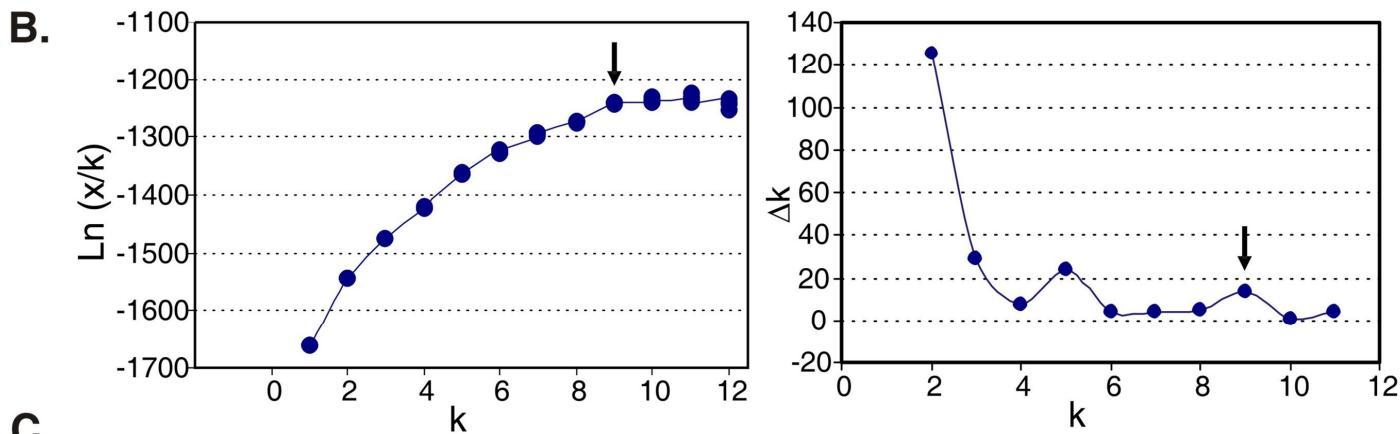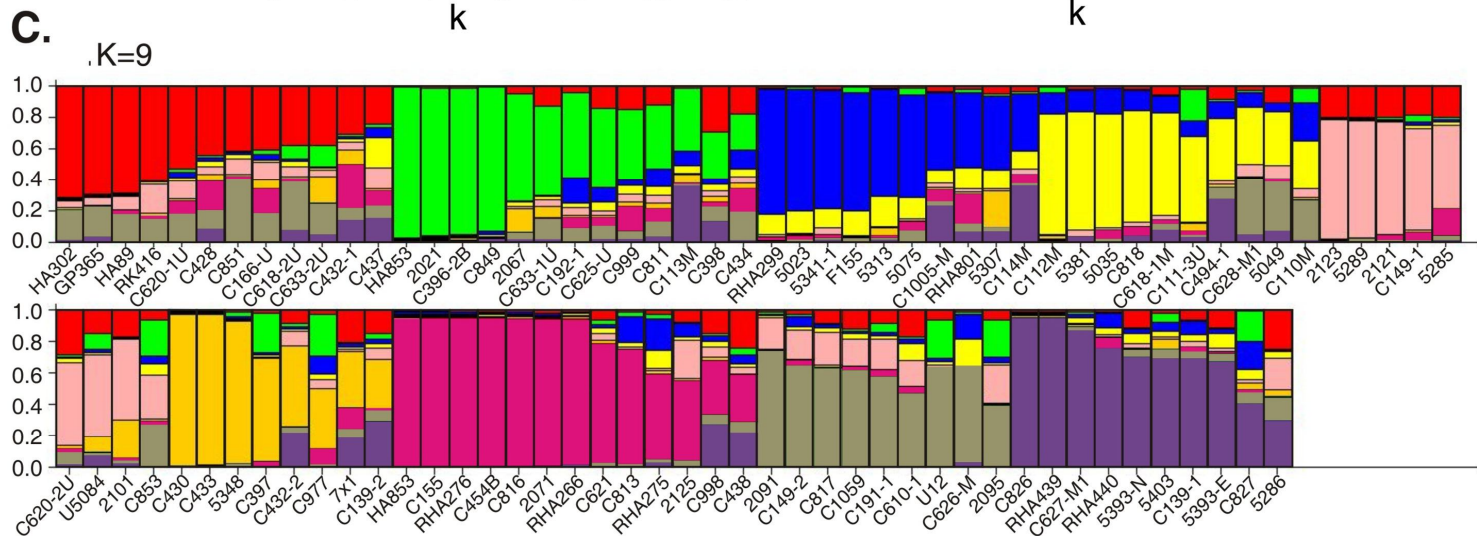

Supplement: 1471-2229-12-93-S2.pdf [file 1471-2229-12-93-S2.pdf]
